# Supplementary material
Source: PubMed Central journal article supplement (PMC3513414)
Supplement: embor2012161s1.pdf [file embor2012161s1.pdf]

## **SUPPLEMENTARY MATERIAL**

### **MATERIAL AND METHODS**

#### ***In vitro* priming on ssDNA oligonucleotides**

The reaction mixture contained 100 fmol ssDNA oligonucleotide, 10 mM Tris-HCl [pH 8.0], 25 mM MgCl<sub>2</sub>, 1 mM DTT, 100 µg/ml BSA, 400 µM ATP, 150 µM CTP, 10 µM GTP, 150 µM UTP, (α-<sup>32</sup>P) 1mM GTP, 4 units RNase inhibitor (Amersham Biosciences), 500 fmol of POLRMT and 1 pmol of mtSSB. After 30 min incubation at 32 °C, 12 units of RNase free DNase I (Qiagen) was added. Reactions were processed as previously described for *in vitro* transcription reactions [1] and analyzed on a 25 % polyacrylamide gel containing 3 M urea in 1 × TBE.

#### **Rolling-circle mtDNA replication**

Reactions were carried out as described previously [2] unless indicated otherwise, in the presence of [α-<sup>32</sup>P] dCTP in order to label newly synthesized DNA. For rolling-circle template formation, we cloned a DNA fragment corresponding to nts 5275–6203 of the mitochondrial human genome between the HindIII and EcoRI sites in the pBluescript SK(+) vector (Agilent Technologies; La Jolla, CA). The pBluescript SK(+)OriL construct was used as a template in site-directed PCR mutagenesis reactions to generate the mutant variants of OriL. The mouse OriL and mutant variants were obtained by PCR amplification of a region in the mouse mitochondrial genome corresponding to nts 4921-5521. As template we used the clones obtained for sequence analysis of mouse mtDNA genomes. The fragments obtained were cloned between the HindIII and EcoRI sites in pBluescript SK(+). Constructs were confirmed by sequencing and used for ssDNA isolation following the manufacturer's protocol (Stratagene). To produce the rolling-

circle DNA replication template, we annealed a 70-mer oligonucleotide (20 pmol) (5'-42[T]-ATC TCA GCG ATC TGT CTA TTT CGT TCA T-3') to the pBluescript SK(+)-OriL ssDNA (2 pmol) and the second strand was synthesized in a PCR reaction using KOD Hot Start DNA polymerase (Novagen). The samples were purified using the QIAquick PCR Purification Kit (QIAGEN). The reaction mixtures (20  $\mu$ L) contained 10 fmol of the dsDNA template (wt or mutant versions) in the presence of 150  $\mu$ M UTP, 150  $\mu$ M GTP, 150  $\mu$ M CTP, TWINKLE (100 fmol), POL $\gamma$ A (250 fmol), POL $\gamma$ B (375 fmol, calculated as dimer), mtSSB (5 pmol), and POLRMT (250 fmol) if nothing else is indicated in the figure legends. We stopped the reactions after 60 min (or at the times indicated in the figures) at 37 °C by adding 6  $\mu$ L of stop alkaline gel loading buffer and the samples were analyzed as described before [1, 3, 4].

#### **Southern Blot analysis:**

Rolling circle reactions and Southern blot analysis was carried out as described previously [2] using radioactively labeled 50-mer probes. Primer sequences are available upon request.

#### **Mutation Load Analysis:**

For sequencing of mtDNA, we isolated tissue from 8 genetically modified mice, carrying a proofreading deficient form of the mitochondrial DNA polymerase  $\gamma$  (Pol $\gamma$ A<sup>D257A</sup>/PolA $\gamma$ A<sup>D257A</sup>), that display increased overall levels of somatic mtDNA point mutations [5]. Total DNA was extracted from liver, large intestine or from tail biopsy samples obtained from the mice at weaning (3 weeks of age). The target region for the analysis spanned the 3' end of the mt-nad2 gene to approximately the midpoint of the mt-co1 gene (primers N2-H4921 5'-CCT ACC CCT

AGC CCC CC-3' and C1-L5953 5'-AGT ATA GTA ATG CCT GCG GC-3'). DNA was amplified using the Phusion® High-Fidelity DNA Polymerase (Finnzymes).

PCR products were cloned using the Zero Blunt® TOPO® PCR Cloning Kit (Invitrogen). Plasmids were purified by the NucleoSpin® 96 Plasmid (Machery-Nagel) on a vacuum-equipped Microlab® Starlet system (Hamilton Robotics). Sequencing was conducted using vector-encoded M13F and M13R primers, using Big Dye v3.1 chemistry. Sequencing products were purified using the BigDye® Xterminator™ Purification Kit, and resolved on a 3730 DNA Analyzer (Life Technologies – Applied Biosystems). 974 bp of consistently clean clone sequence was used in this analysis (positions 4950-5923 on the reference sequence from GenBank Accession JF286601.1). A total of 1747 clones ( $\approx 1,700,000$  bp of sequence) were used in this study. For analysis of the polyT region within OriL (11 dA's at positions 5172-5182 on the reference genome), 346 clones were determined to give reads of sufficient clarity for two-strand confirmation of the number of encoded dT's. To test if the observed decrease in mutation load at OriL was statistically significant, we generated 1000 data sets, each by randomly selecting 32 non-OriL sites from our sequencing data. We then compared the mean per-site mutation rate of each simulated data set to that observed for OriL. The observed per-site mutation load in OriL was lower than in 968 of the 1000 random data sets analyzed ( $\alpha = 0.05$ , 2 tailed t-test), demonstrating that the OriL sequence differed significantly from the surrounding sequences. To determine the background error rate for the assay, a single clone containing 3 SNPs was chosen, diluted into *Drosophila melanogaster* total DNA extract, and amplified, cloned and sequenced as above. Of 295 clones assayed, only one variation from the reference sequence was observed (error rate of  $3.48 \times 10^{-6}$ ) and no variation in the number of dA's were observed.

## REFERENCES

1. Gaspari M, Falkenberg M, Larsson NG, Gustafsson CM (2004) The mitochondrial RNA polymerase contributes critically to promoter specificity in mammalian cells. *The EMBO journal* **23**: 4606-4614
2. Fuste JM *et al* (2010) Mitochondrial RNA polymerase is needed for activation of the origin of light-strand DNA replication. *Molecular cell* **37**: 67-78
3. Korhonen JA, Pham XH, Pellegrini M, Falkenberg M (2004) Reconstitution of a minimal mtDNA replisome in vitro. *The EMBO journal* **23**: 2423-2429
4. Wanrooij S, Fuste JM, Farge G, Shi Y, Gustafsson CM, Falkenberg M (2008) Human mitochondrial RNA polymerase primes lagging-strand DNA synthesis in vitro. *Proceedings of the National Academy of Sciences of the United States of America* **105**: 11122-11127
5. Trifunovic A *et al* (2004) Premature ageing in mice expressing defective mitochondrial DNA polymerase. *Nature* **429**: 417-423

**Supplementary table S1. OriL and mutant OriL derivatives used in this study.**

| Name        | Modification                                 | Sequence 5' to 3'                                      |
|-------------|----------------------------------------------|--------------------------------------------------------|
| Wt          | Wild-Type                                    | GGGCTTCTCCCGCCTTTTTCCCGGCGGCGGAGAAGTAGATTGAAG          |
| Stem +6     | Duplication 5735-40 and 5753-58              | GGGCTTCTCCCGCCCCCGCCTTTTTCCCGGCGGCGGGGCGGGAGAAGTAGATTG |
| Stem +3     | Duplication 5738-40 and 5753-56              | GGGCTTCTCCCGCCGCTTTTTCCCGGCGGCGGCGGAGAAGTAGATTG        |
| Stem -1     | Deletion 5735 and 58                         | GGGCTTCTCCGCTTTTTCCCGGCGGCGGAGAAGTAGATTGAAGCC          |
| Stem -2     | Deletion 5735-36 and 5757-58                 | GGGCTTCTCGCCTTTTTCCCGGCGGCGAGAAGTAGATTGAAGCCAG         |
| Stem -3     | Deletion 5735-37 and 5756-58                 | GGGCTTCTGCCTTTTTCCCGGCGGCGAGAAGTAGATTGAAGCCAGTT        |
| Stem -4     | Deletion 5734-37 and 5756-59                 | GGGCTTCCGCTTTTTCCCGGCGGCGAGAAGTAGATTGAAGCCAGTT         |
| Stem -5     | Deletion 5732-36 and 5757-61                 | GGGCTCGCCTTTTTCCCGGCGGCGAGTAGATTGAAGCCAGTT             |
| Stem -6     | Deletion 5732-36+5740 and 5757-61+5753       | GGGCTCGCTTTTTCCCGGCGGCGAGTAGATTGAAGCCAGTT              |
| Stem SeqA   | 5738-40 CGG→GCC<br>5753-55 CCG→GGC           | GGGCTTCTCCCGGTTTTTTCCCGGCCCGGGAGAAGTAGATTGAAG          |
| Stem SeqB   | 5735-37 GGG→CCC<br>5756-58 CCC→GGG           | GGGCTTCTGGGGCTTTTTCCCGGCGGCCCCAGAAGTAGATTGAAG          |
| Stem SeqC   | 5732-34 AGA→TCT<br>5759-61 TCT→AGA           | GGGCTGAGCCCGCCTTTTTCCCGGCGGCGGGCTCAGTAGATTGAAG         |
| Stem SeqD   | 5730-31 GA→CT<br>5762-63 TC→AG               | GGGAGTCTCCCGCTTTTTCCCGGCGGCGGAGACTTAGATTGAAG           |
| Stem SeqE   | 5730-40 and 5753-63<br>Stem Seq A-D combined | GGGGAAGAGGGCGGTTTTTTCCCGGCCCGCCCTCTTAGATTGAAG          |
| Mouse wt    | mouse Wild-Type                              | AAGACTTCTACCGCCATTTTTTTTTTCGGCGGTAGAAGTAGATTGGAAG      |
| Mouse 5162  | 5162 A→G                                     | AAGACTTCTACCGCCATTTTTTTTTTCGGCGGTAGGAGTAGATTGGAAG      |
| Mouse 5163  | 5163 G→A                                     | AAGACTTCTACCGCCATTTTTTTTTTCGGCGGTAAAAGTAGATTGGAAG      |
| Mouse 5164  | 5164 A→T                                     | AAGACTTCTACCGCCATTTTTTTTTTCGGCGGTTGAAGTAGATTGGAAG      |
| Mouse 5165A | 5165 T→A                                     | AAGACTTCTACCGCCATTTTTTTTTTCGGCGGAAGAAGTAGATTGGAAG      |
| Mouse 5165B | 5165 T→C                                     | AAGACTTCTACCGCCATTTTTTTTTTCGGCGGCAGAAGTAGATTGGAAG      |
| Mouse 5166  | 5166 G→A                                     | AAGACTTCTACCGCCATTTTTTTTTTCGGCGATAGAAGTAGATTGGAAG      |
| Mouse 5168  | 5168 C→G                                     | AAGACTTCTACCGCCATTTTTTTTTTCGGGGGTAGAAGTAGATTGGAAG      |
| Mouse 5169  | 5169 G→A                                     | AAGACTTCTACCGCCATTTTTTTTTTCGACGGTAGAAGTAGATTGGAAG      |
| Mouse 5171  | 5171 C→T                                     | AAGACTTCTACCGCCATTTTTTTTTTGGGCGGTAGAAGTAGATTGGAAG      |
| Mouse 5172  | 5172 T→C                                     | AAGACTTCTACCGCCATTTTTTTTTTCGGCGGTAGAAGTAGATTGGAAG      |
| Mouse 5177  | 5177 T→C                                     | AAGACTTCTACCGCCATTTTCTTTTTTCGGCGGTAGAAGTAGATTGGAAG     |
| Mouse 5178  | 5178 T→C                                     | AAGACTTCTACCGCCATTTTCTTTTTTCGGCGGTAGAAGTAGATTGGAAG     |
| Mouse 5190A | 5190 T→C                                     | AAGACTTCCACCGCCATTTTTTTTTTCGGCGGTAGAAGTAGATTGGAAG      |
| Mouse 5190B | 5190 T→A                                     | AAGACTTCAACCGCCATTTTTTTTTTCGGCGGTAGAAGTAGATTGGAAG      |
| Mouse 5194  | 5194 C→T                                     | AAGATTTCTACCGCCATTTTTTTTTTCGGCGGTAGAAGTAGATTGGAAG      |
| Mouse 5198A | 5198 A→T                                     | TAGACTTCTACCGCCATTTTTTTTTTCGGCGGTAGAAGTAGATTGGAAG      |
| Mouse 5198B | 5198 A→G                                     | GAGACTTCTACCGCCATTTTTTTTTTCGGCGGTAGAAGTAGATTGGAAG      |
| Loop+3nts   | duplication 5747-49                          | GGGCTTCTCCCGCCTTTTTTTTTCCCGGCGGCGGAGAAGTAGATTGAAG      |
| Loop+2nt    | duplication 5747-48                          | GGGCTTCTCCCGCCTTTTTTTTTCCCGGCGGCGGGAGAAGTAGATTGAAG     |
| Loop+1nt    | duplication 5747                             | GGGCTTCTCCCGCTTTTTTTTTCCCGGCGGCGGAGAAGTAGATTGAAG       |
| Loop-1nt    | deletion 5746                                | GGGCTTCTCCCGCCTTTTTTTTTCCCGGCGGCGGAGAAGTAGATTGAAGC     |
| Loop-2nts   | deletion 5745-46                             | GGGCTTCTCCCGCCTTTTTTCGGGCGGCGGAGAAGTAGATTGAAGCC        |
| Loop-3nts   | deletion 5744-46                             | GGGCTTCTCCCGCCTTTTTTGGGCGGCGGAGAAGTAGATTGAAGCCA        |
| Mouse -3T   | deletion 5181<br>and 5182                    | AAGACTTCTACCGCCATTTTTTTTTTCGGCGGTAGAAGTAGATT           |
| Mouse -1T   | deletion 5182                                | AAGACTTCTACCGCCATTTTTTTTTTCGGCGGTAGAAGTAGATT           |

**Supplementary table S1. cont.**

| Name      | Modification                | Sequence 5' to 3'                                |
|-----------|-----------------------------|--------------------------------------------------|
| Mouse +1T | duplication 5182            | AAGACTTCTACCGCCATTTTTTTTTTTTTTCGGCGGTAGAAGTAGATT |
| Mouse +2T | duplication 5181 and 5182   | AAGACTTCTACCGCCATTTTTTTTTTTTTTCGGCGGTAGAAGTAGATT |
| Mouse +3T | duplication 5180-82         | AAGACTTCTACCGCCATTTTTTTTTTTTTTCGGCGGTAGAAGTAGATT |
| TTTTAA    | 5747-48 TT→AA               | GGGCTTCTCCCGCCTTTAAACCCGGCGGGGAGAAGTAGATTGAAG    |
| TTTAAA    | 5747-49 TTT→AAA             | GGGCTTCTCCCGCCTTTAAACCCGGCGGGGAGAAGTAGATTGAAG    |
| TTAAAA    | 5747-50 TTTT→AAAA           | GGGCTTCTCCCGCCTTTAAACCCGGCGGGGAGAAGTAGATTGAAG    |
| TAAAAA    | 5747-51 TTTTT→AAAAA         | GGGCTTCTCCCGCCTAAAAACCCGGCGGGGAGAAGTAGATTGAAG    |
| ATTTTT    | 5752 T→A                    | GGGCTTCTCCCGCCATTTTCCCGCGGGGAGAAGTAGATTGAAG      |
| AATTTT    | 5751-52 TT→AA               | GGGCTTCTCCCGCCAATTTTCCCGCGGGGAGAAGTAGATTGAAG     |
| AAATTT    | 5750-52 TTT→AAA             | GGGCTTCTCCCGCCAAATTTCCCGCGGGGAGAAGTAGATTGAAG     |
| TATTTT    | 5751 T→A                    | GGGCTTCTCCCGCCTATTTTCCCGCGGGGAGAAGTAGATTGAAG     |
| ATAAAA    | 5752 T→A; 5747-50 TTTT→AAAA | GGGCTTCTCCCGCCATAAAACCCGGCGGGGAGAAGTAGATTGAAG    |

Supplementary figure S1.

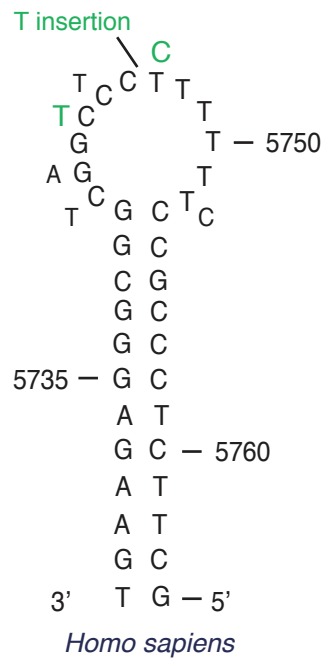

**Figure S1. Naturally occurring sequence polymorphisms in human OriL.**  
Frequent changes are indicated in green.

Supplementary figure S2.

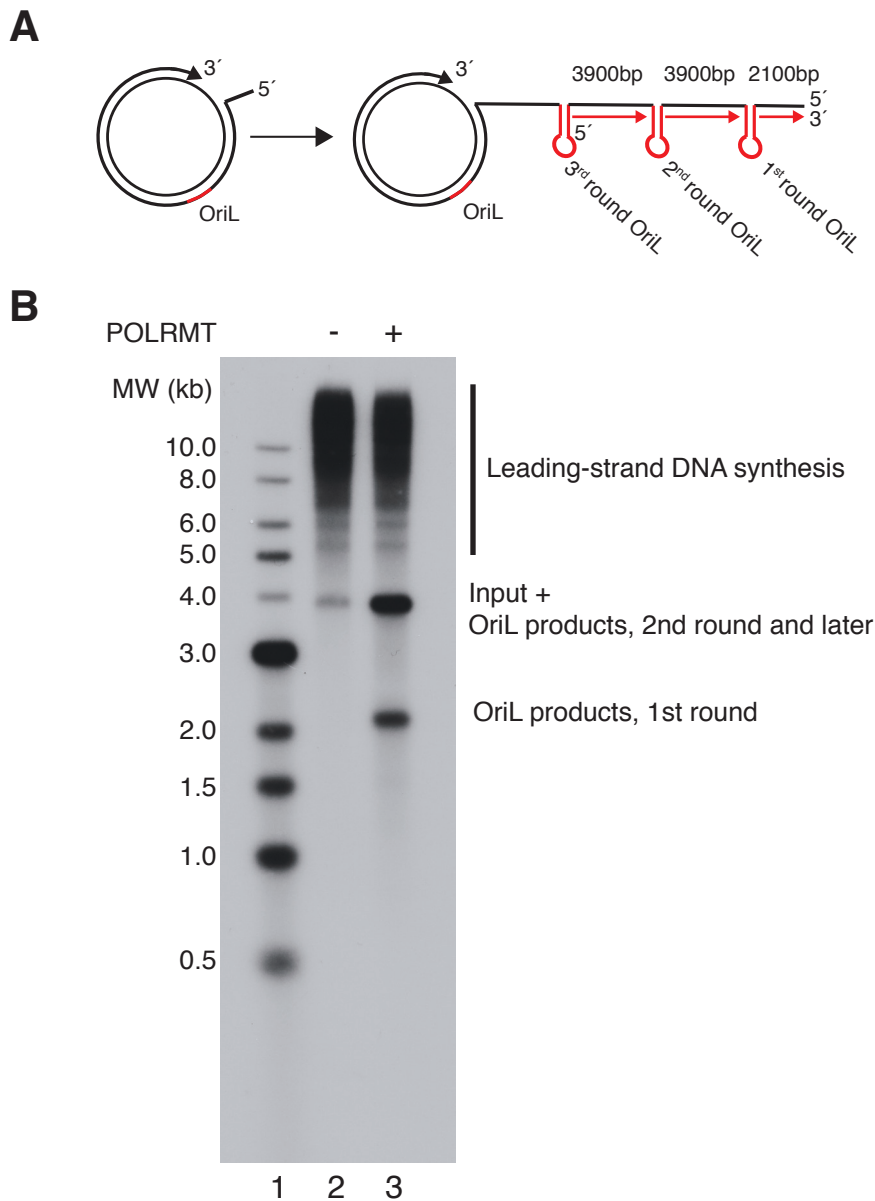

**Figure S2. Products formed during rolling-circle mtDNA replication in vitro.** (A) Schematic illustration explaining the replication products formed by OriL dependent initiation of lagging-strand DNA synthesis. During the first round of DNA synthesis, the OriL-dependent lagging-strand products have a length of about 2100 nts, starting from OriL and stopping at the 5'-end of the template strand. This lagging-strand product can be easily observed, since it is clearly distinct in size from the input template. However, as leading-strand DNA synthesis progresses, OriL is exposed a 2nd, 3rd, and maybe even a 4th time. These later lagging-strand initiation events, will lead to full-length DNA products, i.e. these replication events will progress until they reach the 5'-end of the previous lagging-strand replication event at OriL. The fragments will therefore span the entire distance between two OriL sequences on the leading-strand DNA template (about 3900 nts). The length of these lagging-strand DNA synthesis products will thus be nearly identical to the labeled input template and impossible to separate from the input band, which thus appears stronger. (B) Separation of replication products on a denaturing agarose gel (0.7%, w/v). In the absence of POLRMT (lane 2) only leading strand products can be observed. Templates, not used for productive, rolling-circle replication are also labelled in this reaction. This labeling is most likely explained by POL $\gamma$  idling on the free 3'-end of the input template. In the presence of POLRMT (lane 3), first passage OriL products migrate as a unique band of 2100 nts. Later rounds of OriL-dependent synthesis migrate with the same size as the input template. Therefore, the input band appears stronger, in reactions with active OriL-dependent DNA synthesis.



Supplementary figure S3

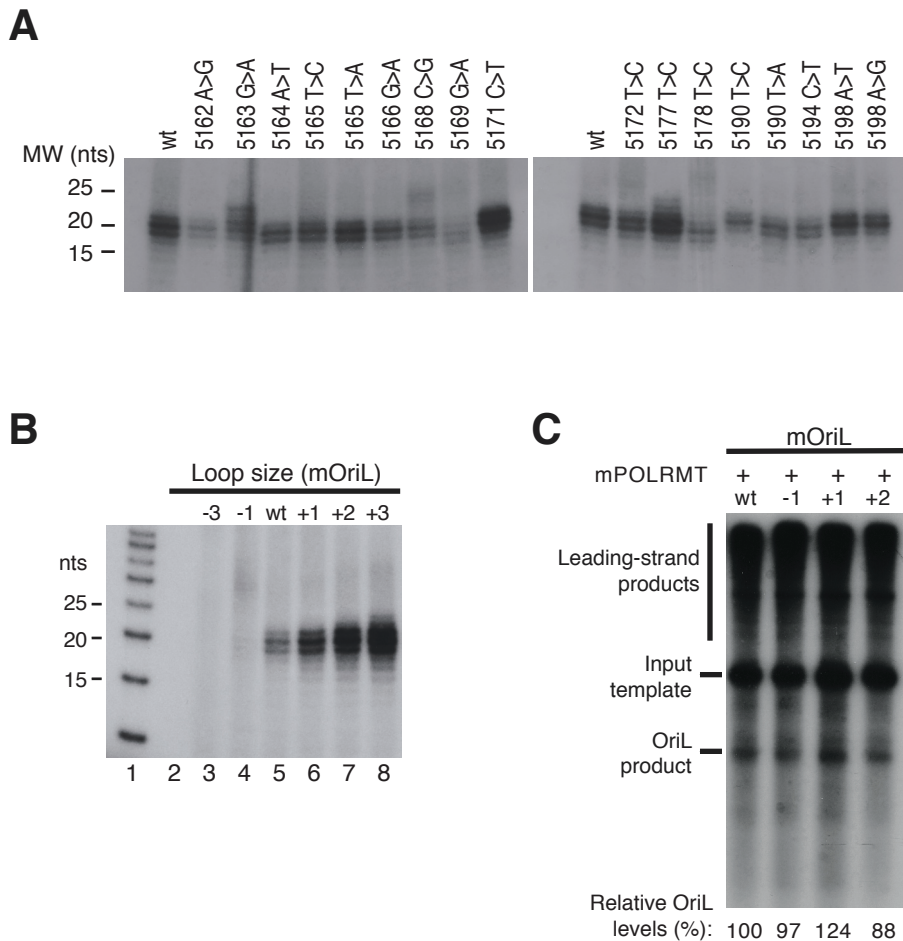

**Figure S3. Primer synthesis and rolling-circle DNA replication using recombinant mouse proteins.** (A) All mutations identified in the stem-loop structure of mouse OriL (see Figure 1 C) could support primer synthesis *in vitro*, even if the efficiency varied somewhat between templates. Primase reactions were performed in the presence of mouse Polrmt and mtSSB on ssDNA mouse templates in the presence of [ $\alpha$ -<sup>32</sup>P]-GTP to label newly synthesized RNA. The sequence of the templates was modified as indicated and the exact sequences are provided in Table S1. After 30 minutes at 32 °C, reactions were analyzed on 25 % PAGE/Urea gels as described in experimental procedures. (B) Poly T-stretch (loop size) length variations found in mutator (polyAD257A/ polyAD257A) mice do not affect priming. Primase reactions were performed as in Figure 2 A but in the presence of mouse OriL (mOriL) and mouse Polrmt. The T-repeat length in mouse OriL was modified with between -3 to +3 nts, as indicated and the exact sequences are provided in Table S1. (C) *In vitro* lagging-strand replication efficiency is not influenced by the poly-T stretch length variations found in mutator (polyAD257A/ polyAD257A) mice. Activity of wt mouse OriL and indicated mutant derivatives was monitored as described in Figure 2 C, but in the presence of mouse Polrmt instead of human POLRMT.

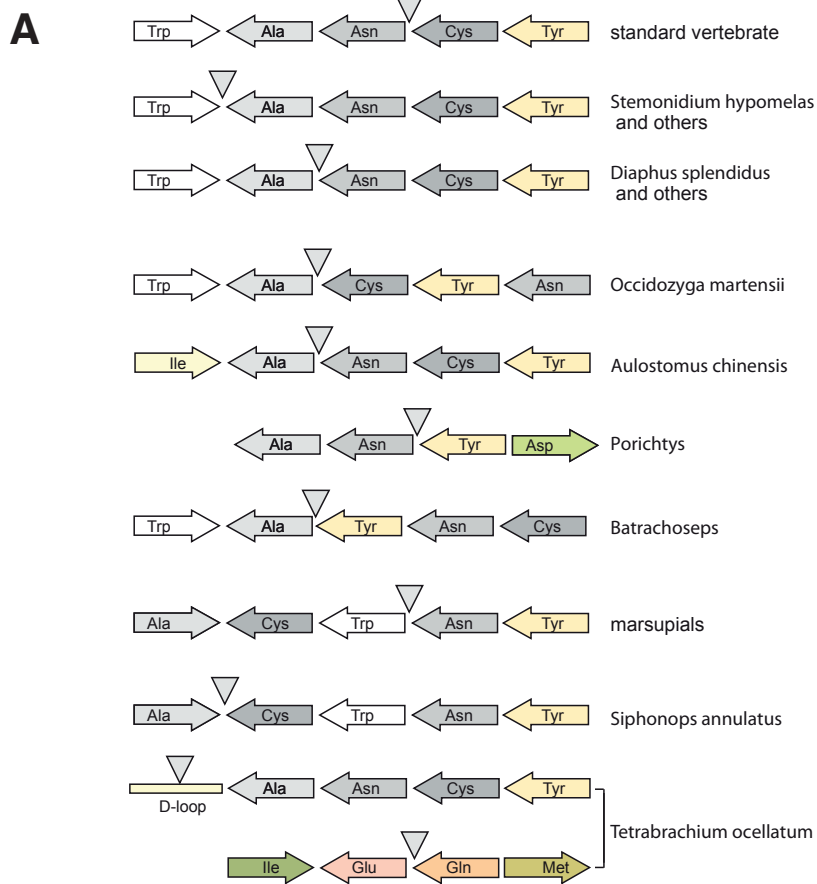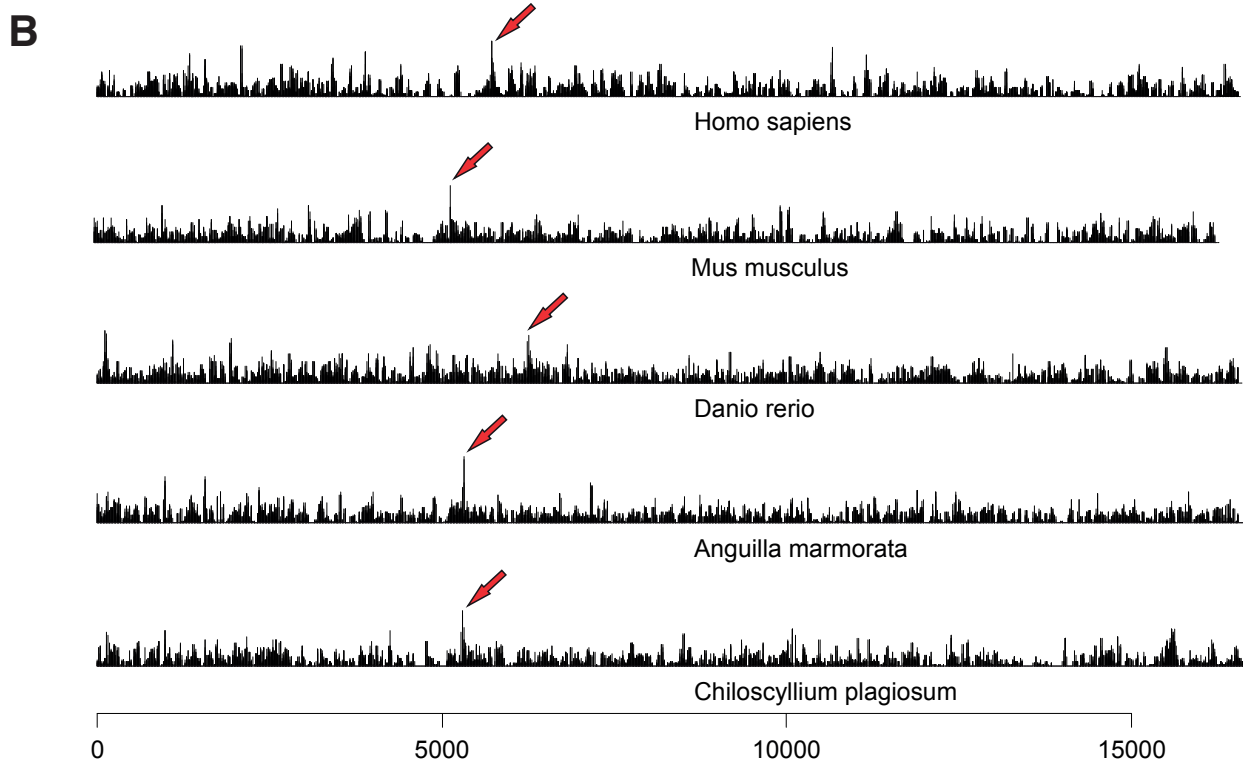

**Figure S4 .** (A) Recombination events involving OriL. A selection of representative genomes are displayed. (B) Hairpin structures was identified in mitochondrial genomes using UNAFold (Markham and Zuker, 2008). The OriL sequence forms a stable hairpin (red arrows).
